# Supplementary material for: The environmental effect on the fluorescence intensity in solution. An analytical model
Source: Royal Society of Chemistry journal article supplement (doi:10.1039/b912063g), 2009-01-01
Supplement: b912063g.pdf [file b912063g.pdf]

## EXPERIMENTAL PROCEDURES

### 1.- Experimental procedure used for obtaining the results given in Figure 5.

#### 1.a) Coraline solutions

Coraline solutions 100 mg L<sup>-1</sup>, were prepared by dissolving the solid coraline in the corresponding solvents. The following dilute solutions were made fresh just before using: 0.5, 1, 2, 3 and 5 mg L<sup>-1</sup>.

#### 1.b) Apparatus and experimental conditions

All measurements were carried out in a Photon Technology International (PTI) Time Master fluorescence spectrometer working in a L-configuration (model TM-2/2003-PTI). Slit widths of 2 nm (excitation) and 5 nm (emission) were selected. A 4 mL Hellma QS 101 quartz cuvette of 1 cm pathlength was used. Excitation and fluorescence wavelengths used in each solvent were those corresponding to the maximum absorbance and fluorescence:

CHCl<sub>3</sub>:  $\lambda_{\text{abs}}=404$  nm,  $\lambda_{\text{flu}}=456$  nm;

Glacial acetic acid:  $\lambda_{\text{abs}}=406$  nm,  $\lambda_{\text{flu}}=466$  nm;

CH<sub>2</sub>Cl<sub>2</sub>:  $\lambda_{\text{abs}}=402$  nm,  $\lambda_{\text{flu}}=459$  nm;

Acetonitrile:  $\lambda_{\text{abs}}=406$  nm,  $\lambda_{\text{flu}}=469$  nm;

Methanol:  $\lambda_{\text{abs}}=408$  nm,  $\lambda_{\text{flu}}=461$  nm;

Formic acid:  $\lambda_{\text{abs}}=404$  nm,  $\lambda_{\text{flu}}=467$  nm;

Bi-distilled water:  $\lambda_{\text{abs}}=410$  nm,  $\lambda_{\text{flu}}=471$  nm;

Dimethylsulfoxide:  $\lambda_{\text{abs}}=410$  nm,  $\lambda_{\text{flu}}=472$  nm;

### 2.- Experimental procedure used for obtaining the results given in Figure 7.

#### 2.a) Fluorophores solutions

Berberine, auramine and coptisine solutions 100 mg L<sup>-1</sup>, were prepared by dissolving the corresponding solids reagents in methanol. From these, 1 mg L<sup>-1</sup> diluted solutions were made fresh just before using.

## 2.b) Dodecanol/Methanol mixtures

Were prepared by mixing the appropriate volumes of both liquids (99% purity).

## 2.c) Apparatus and experimental conditions

All measurements were carried out in a Photon Technology International (PTI) Time Master fluorescence spectrometer working in a L-configuration (model TM-2/2003-PTI). Slit widths of 2 nm (excitation) and 5 nm (emission) were selected. A 4 mL Hellma QS 101 quartz cuvette of 1 cm pathlength was used. Excitation and fluorescence wavelengths used were those corresponding to the maximum absorbance and fluorescence:

Berberine:  $\lambda_{\text{abs}}=354$  nm,  $\lambda_{\text{flu}}=520$  nm;

Coptisine:  $\lambda_{\text{abs}}=402$  nm,  $\lambda_{\text{flu}}=559$  nm;

Auramine:  $\lambda_{\text{abs}}=420$  nm,  $\lambda_{\text{flu}}=487$  nm;
